# Supplementary material for: The hormone-bound vitamin D receptor enhances the FBW7-dependent turnover of NF-κB subunits
Source: PubMed Central journal article supplement (PMC4534774; doi:10.1038/srep13002), 2015-08-13
Supplement: srep13002-s1.pdf [file srep13002-s1.pdf]

**The hormone-bound vitamin D receptor enhances the FBW7-dependent turnover of NF- $\kappa$ B subunits**

Fatemeh Fekrmandi<sup>1</sup>, **Tian-Tian Wang**<sup>2</sup>, and John H. White<sup>1, 2\*</sup>

Departments of Medicine<sup>1</sup> and Physiology<sup>2</sup>, McGill University, Montreal, Quebec,  
Canada

\*Address correspondence to [john.white@mcgill.ca](mailto:john.white@mcgill.ca)

Supplementary Figures.

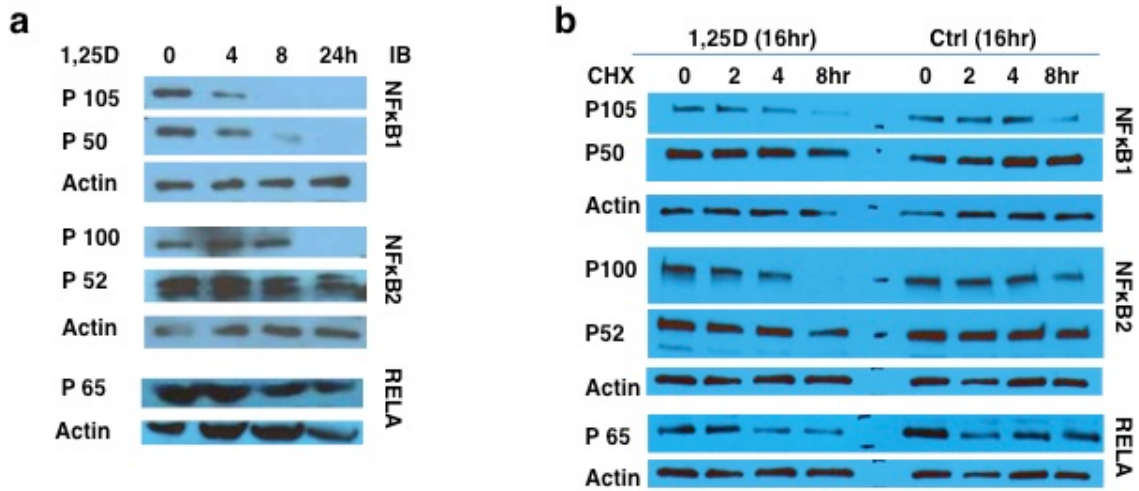

**Supplementary Figure 1.** **a.** Effect of treatment with 1,25D (100nM) on expression of NF-kB subunits in LNCaP cells. **b.** Effect of preincubation (16h) of LNCaP cells with DMSO vehicle (control) or 1,25D (100nM) followed by incubation with cycloheximide on turnover or NF-kB subunits, as indicated.

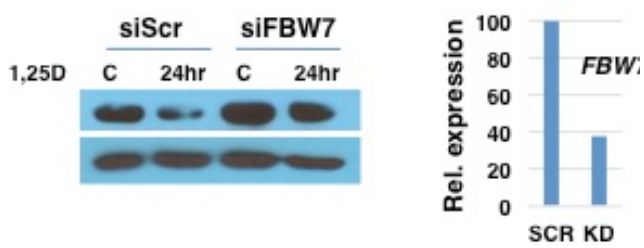

**Supplementary Figure 2.** Effect of treatment with 1,25D (100nM) on expression of NF-kB subunit p65 in LNCaP cells transfected with scrambled control siRNA or siRNA targeting *FBW7*. RT/qPCR analysis of *FBW7* expression is shown at right.

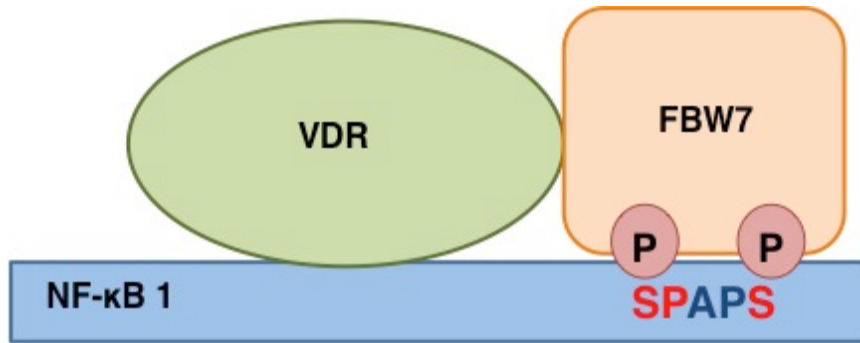

**Supplementary Figure 3.** Schematic illustration of suggested mechanism for formation of a VDR-FBW7-p105 complex to promote NF-κB degradation.

**Supplementary Tables.**

| <b>Table 1: siRNAs</b> |                             |
|------------------------|-----------------------------|
| Gene name              | siRNA Sequence              |
| <b>FBW7</b>            | 5'-CCCTAAAGAGTTGGCACTCTA-3' |
| <b>Control</b>         | 5'-CAGGGTATCGACGATTACAAA-3' |

| <b>Table 2: qPCR primers</b> |                            |
|------------------------------|----------------------------|
| Primer name                  | Sequence                   |
| <b>FBW7- Forward</b>         | 5'-CAGCAGTCACAGGCAAATGT-3' |
| <b>FBW7- Reverse</b>         | 5'-GCATCTCGAGAACCGCTAAC-3' |
| <b>NFκB1- Forward</b>        | GCAGCACTACTTCTTGACCACC     |
| <b>NFκB1- Reverse</b>        | TCTGCTCCTGAGCATTGACGTC     |
| <b>NFκB2- Forward</b>        | GGCAGACCAGTGTCATTGAGCA     |
| <b>NFκB2- Reverse</b>        | CAGCAGAAAGCTCACCACACTC     |
| <b>RELA- Forward</b>         | TGAACCGAAACTCTGGCAGCTG     |
| <b>RELA- Reverse</b>         | CATCAGCTTGCGAAAAGGAGCC     |
| <b>NFκBIA- Forward</b>       | TCCACTCCATCCTGAAGGCTAC     |
| <b>NFκBIA- Reverse</b>       | CAAGGACACCAAAGCTCCACG      |
| <b>MYB- Forward</b>          | GGGAACAGATGGGCAGAAATCG     |
| <b>MYB- Reverse</b>          | GCTGGCTTTTGAAGACTCCTGC     |
| <b>BCL3- Forward</b>         | GAACACCGAGTGCCAAGAAACC     |
| <b>BCL3- Reverse</b>         | GCTAAGGCTGTTGTTTTCCACGG    |
| <b>CCND1- Forward</b>        | TCTACACCGACA ACTCCATCCG    |
| <b>CCND1- Reverse</b>        | TCTGGCATT TTTGGAGAGGAAGTG  |
| <b>UCP2- Forward</b>         | ACAAAGGGTTCATGCCCTCC       |
| <b>UCP2- Reverse</b>         | ACGAACATCACCACGTTCCA       |
| <b>GCNT- Forward</b>         | CTGGAAACGGAGAGGATGCCAT     |
| <b>GCNT- Reverse</b>         | CACGAAGTAGGCACTGCCAGAA     |
| <b>GAPDH- Forward</b>        | GTCTCCTCTGACTTCAACAGCG     |
| <b>GAPDH- Reverse</b>        | ACCACCCTGTTGCTGTAGCCAA     |
